# Supplementary material for: Development of BiOI as an effective photocatalyst for oxygen evolution reaction under simulated solar irradiation
Source: Royal Society of Chemistry journal article supplement (doi:10.1039/d0cy00266f), 2020-01-01
Supplement: d0cy00266f1.pdf [file d0cy00266f1.pdf]

## Supporting Information

### Development of BiOI as an effective photocatalyst for oxygen evolution reaction under simulated solar irradiation

Tzu-Hsin Chen<sup>a</sup>, Masaaki Yoshida<sup>b,c</sup>, Shun Tsunekawa<sup>b</sup>, Jia-Hao Wu<sup>a</sup>, Kun-Yi Andrew Lin<sup>d</sup>, Chechia  
Hu<sup>a\*</sup>,

<sup>a</sup> Department of Chemical Engineering, R&D center for Membrane Technology and Luh Hwa  
Research Center for Circular Economy, Chung Yuan Christian University, Chungli Dist., Taoyuan  
City, Taiwan 32023

<sup>b</sup> Applied Chemistry, Graduate School of Sciences and Technology for Innovation, Yamaguchi  
University, Ube, Yamaguchi, 755-8611, Japan

<sup>c</sup> Blue Energy Center for SGE Technology (BEST), Yamaguchi University, Ube, Yamaguchi, 755-  
8611, Japan

<sup>d</sup> Department of Environmental Engineering & Innovation and Development Center of Sustainable  
Agriculture, National Chung Hsing University, Taichung City, Taiwan 40227

\* To whom correspondence should be addressed. E-mail: [chechiah@cyu.edu.tw](mailto:chechiah@cyu.edu.tw)

Tel: 886-3-2654152 Fax: 886-3-2654199

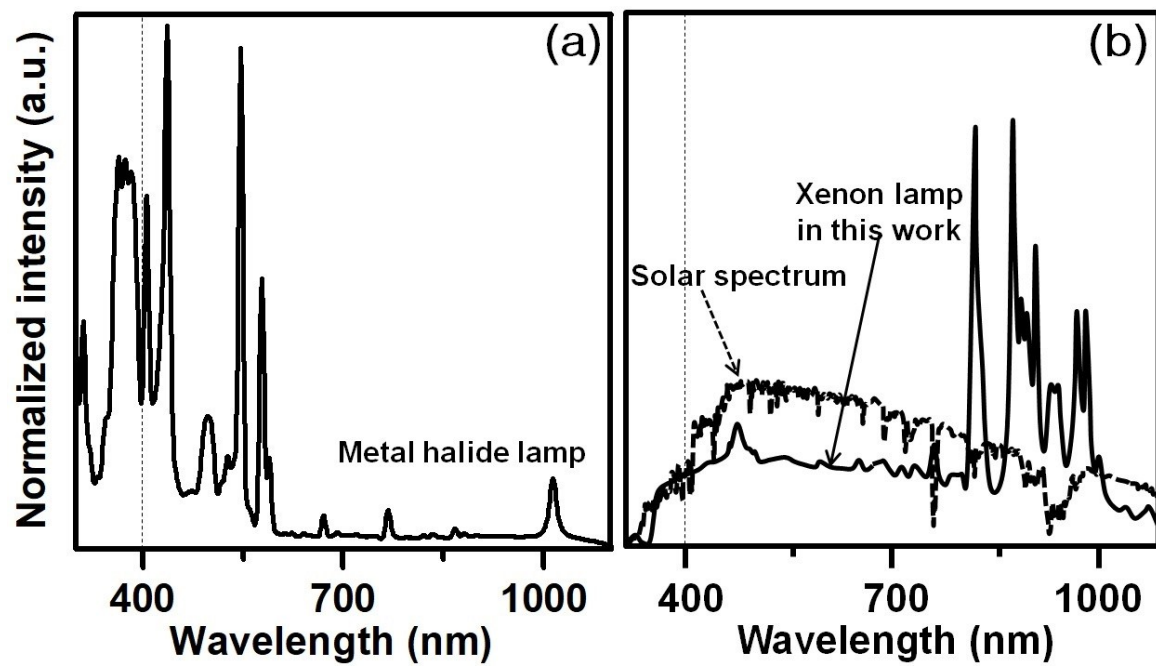

**Figure S1** Spectral irradiance of (a) metal halide lamp and (b) xenon lamp used in this work in comparison to solar radiation.

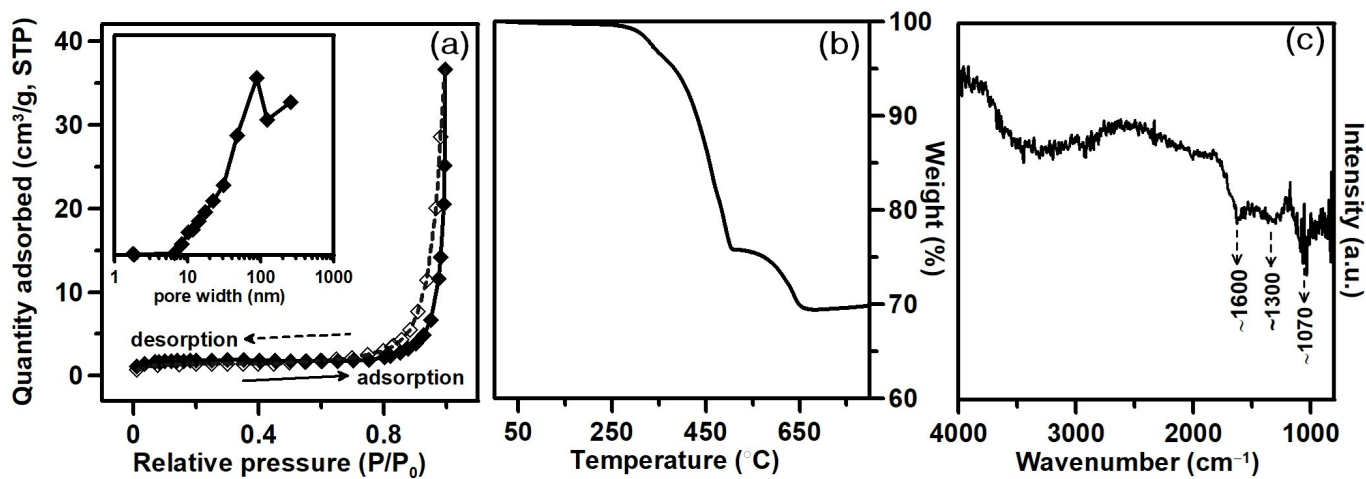

**Figure S2** (a) N<sub>2</sub> adsorption-desorption isotherm, (b) TGA plot, and (d) FTIR measurement of BiOI sample. Inset of (a) shows the Barrett–Joyner–Halenda (BJH) pore diameter of the sample.

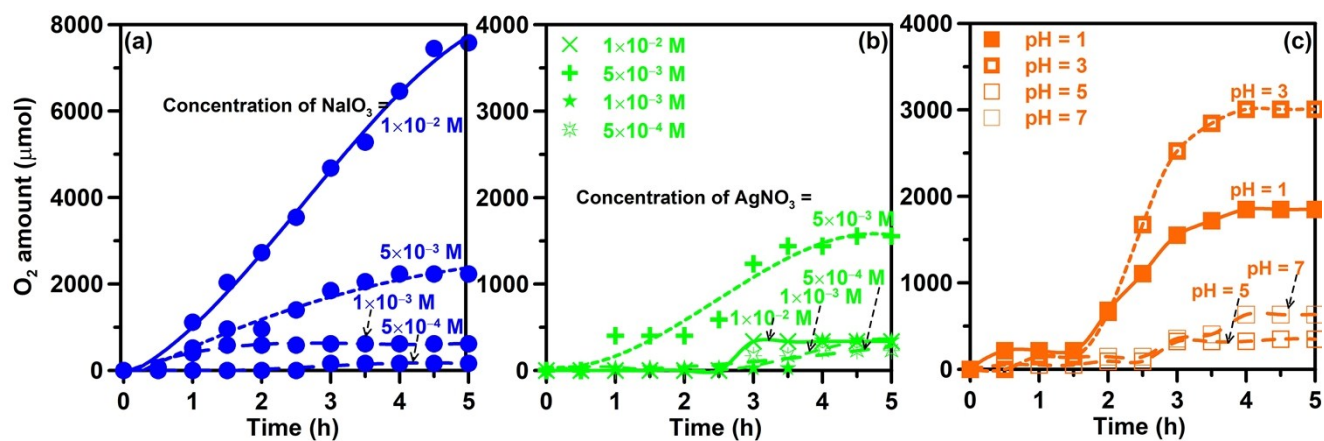

**Figure S3** Photocatalytic O<sub>2</sub> evolution using BiOI under metal halide lamp irradiation in the presence of different concentrations of the electron mediator and the pH adjuster: (a) NaIO<sub>3</sub>, (b) AgNO<sub>3</sub>, and (c) adjusted pH value using HNO<sub>3</sub> to 1, 3, 4, and 7.

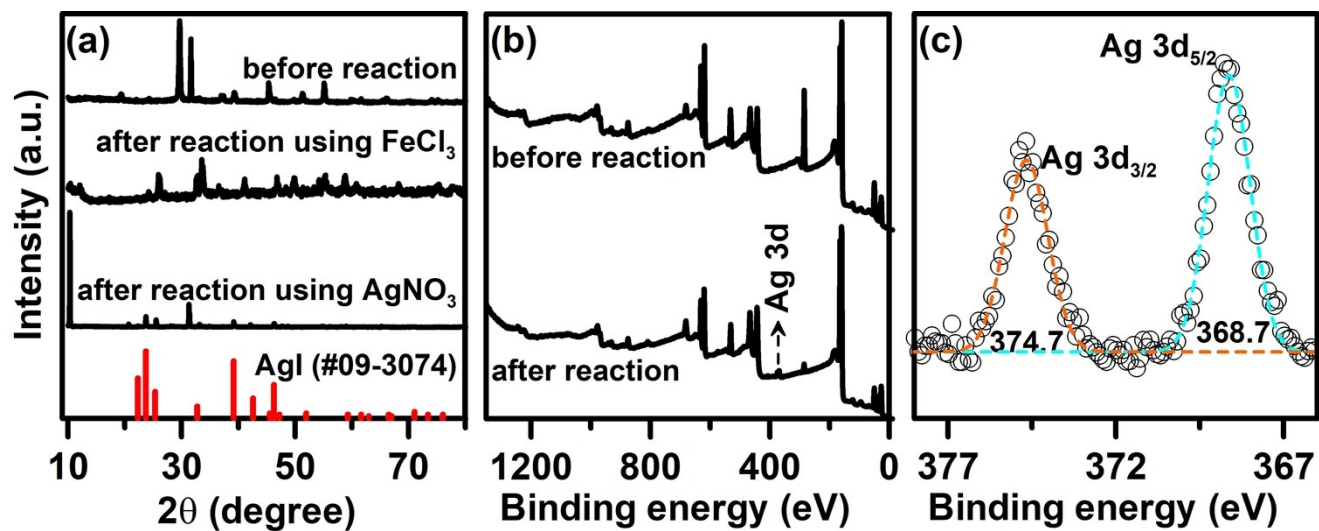

**Figure S4** (a) XRD patterns and XPS spectra for (b) survey scan and (c) Ag 3d state of BiOI before and after the reaction with the addition of  $\text{AgNO}_3$  as the electron mediator.

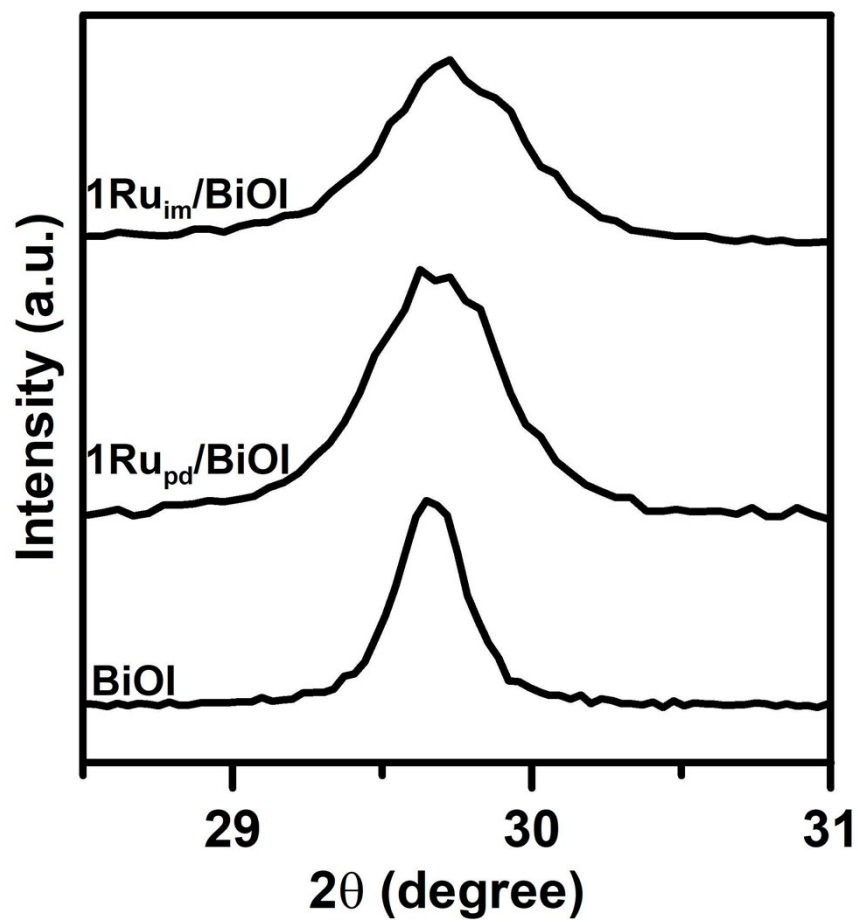

**Figure S5** Magnification of the XRD patterns in the range of 28.5°–31° for BiOI, 1Ru<sub>pd</sub>/BiOI and 1Ru<sub>im</sub>/BiOI samples.

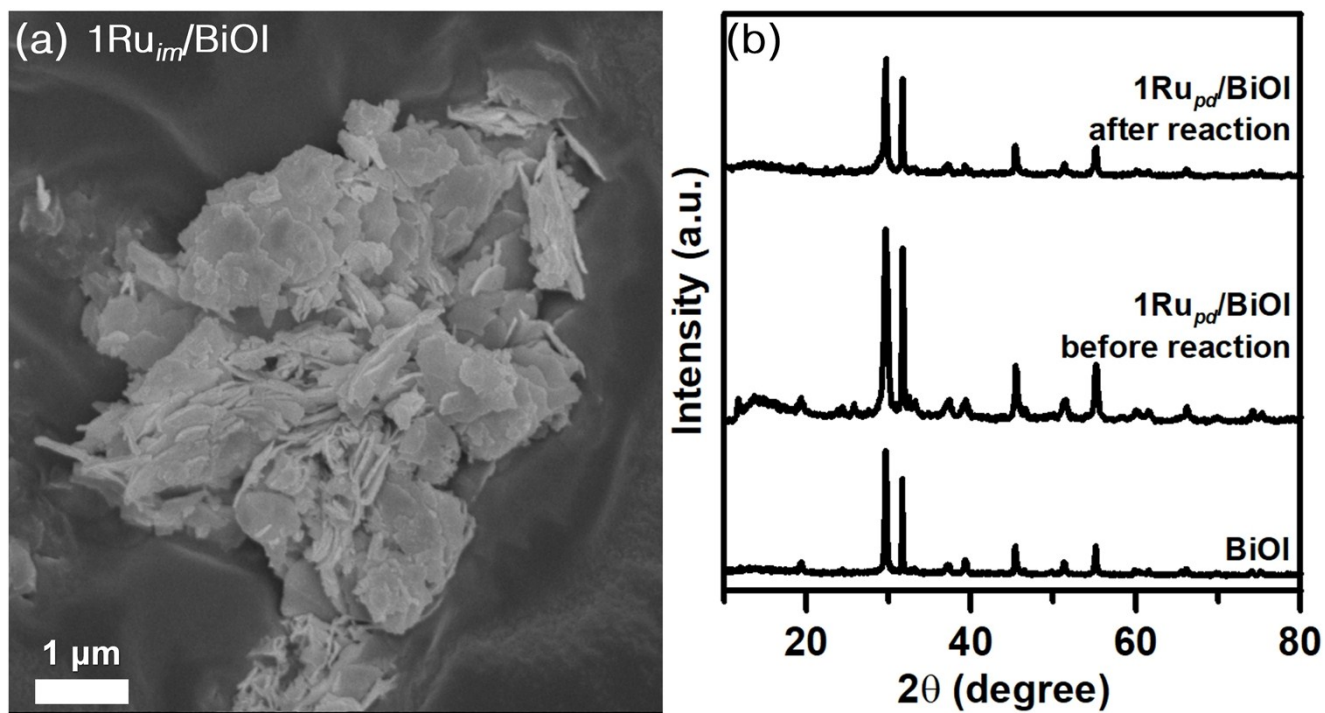

**Figure S6** (a) SEM image of  $1\text{Ru}_{im}/\text{BiOI}$  and (b) XRD patterns of  $1\text{Ru}_{pd}/\text{BiOI}$  before and after the photocatalytic reaction.

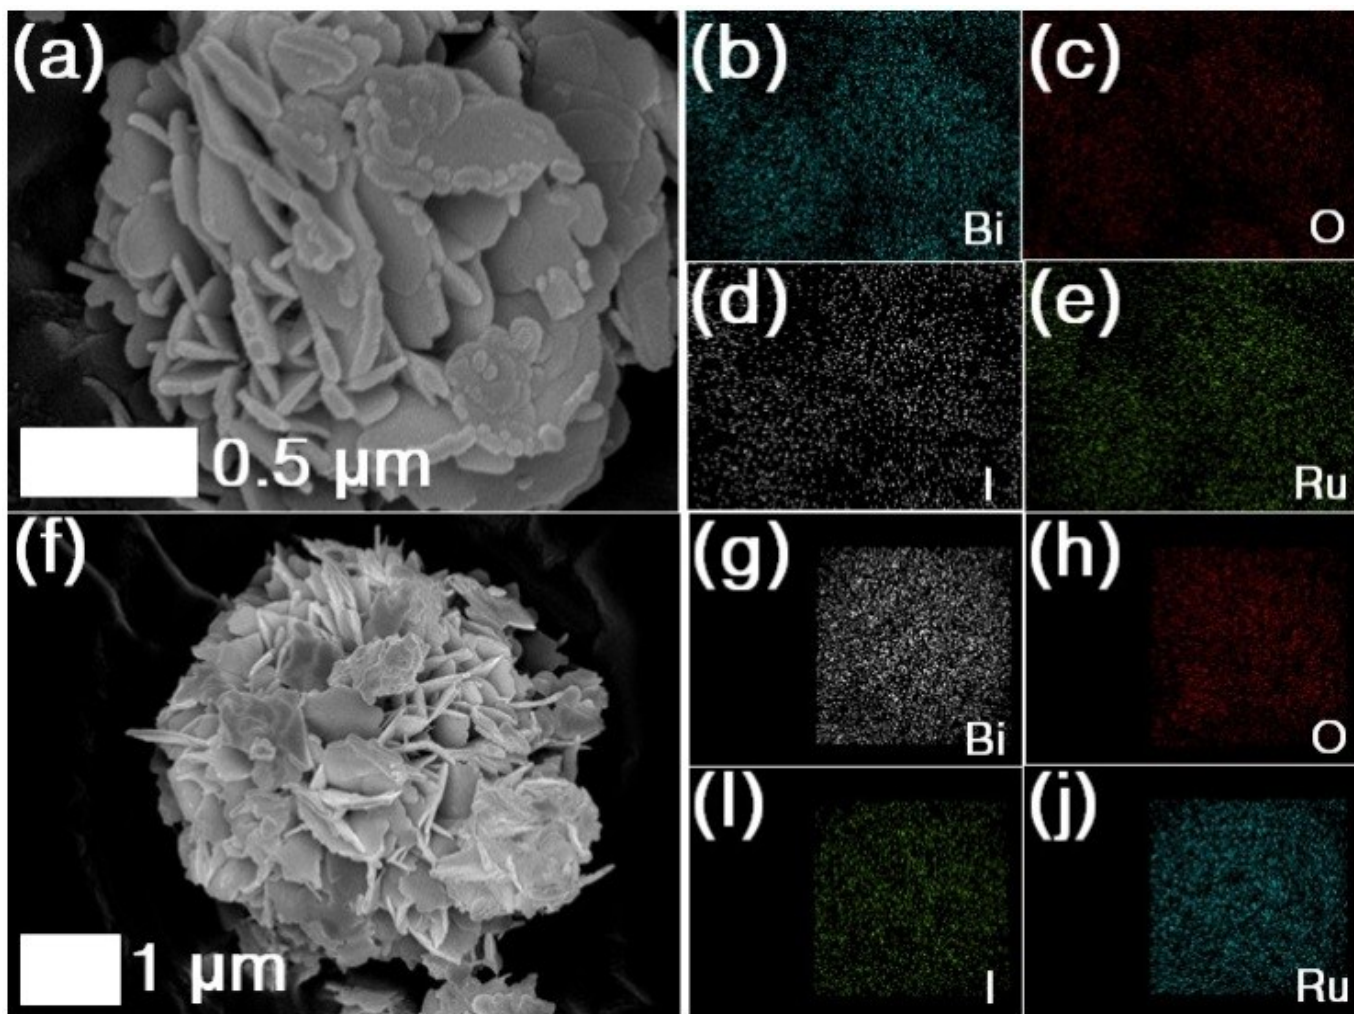

**Figure S7** SEM images and the corresponding elemental mapping for Bi, O, I, and Ru elements of  $1\text{Ru}_{pd}/\text{BiOI}$  samples before (a–e) and after (f–j) the photocatalytic  $\text{O}_2$  production.



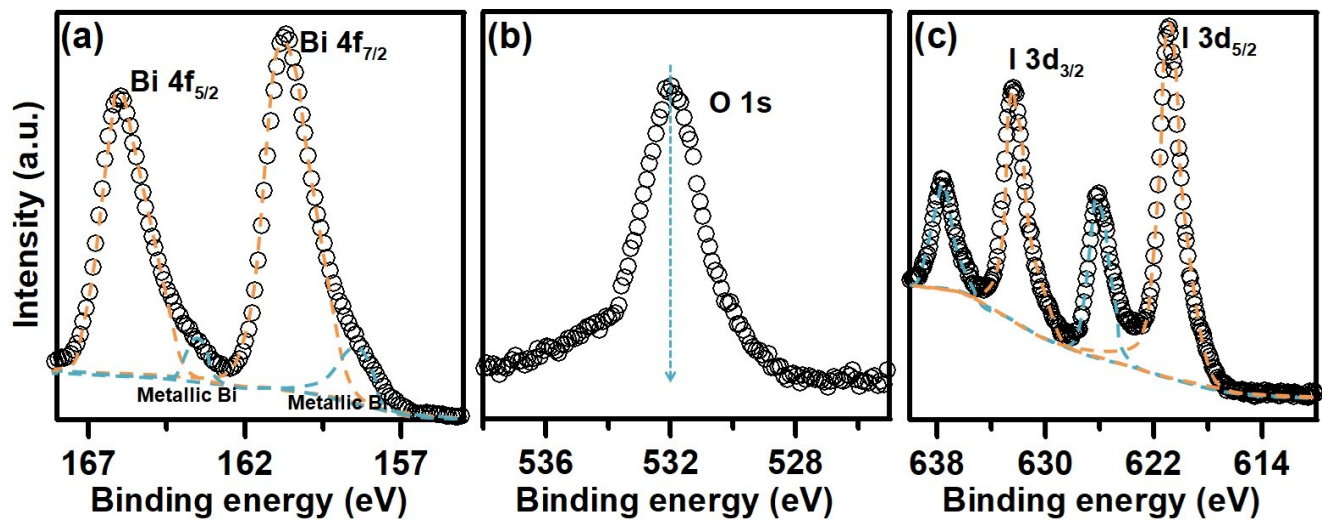

**Figure S8** High-resolution XPS spectra for (a) Bi 4f, (b) O 1s, and (c) I 3d levels of the 1Ru<sub>pd</sub>/BiOI samples after the photocatalytic reaction.
